# Supplementary material for: Cell-specific exon methylation and CTCF binding in neurons regulate calcium ion channel splicing and function
Source: eLife journal article supplement (doi:10.7554/elife.54879), 2020-03-26
Supplement: supp [file elife-54879-supp-v1.zip]

**B**

CTCF

Competitor

Shift

Free probe

1 2 3 4 5 6 7 8 9 10 11 12 13 14 15 16 17 18 19 20 21 22 23 24 25 26 27

| Lane | CTCF | Competitor |
|------|------|------------|
| 1    | -    | -          |
| 2    | +    | -          |
| 3    | +    | +          |
| 4    | -    | -          |
| 5    | +    | -          |
| 6    | +    | +          |
| 7    | -    | -          |
| 8    | +    | -          |
| 9    | +    | +          |
| 10   | -    | -          |
| 11   | +    | -          |
| 12   | +    | +          |
| 13   | -    | -          |
| 14   | +    | -          |
| 15   | +    | +          |
| 16   | -    | -          |
| 17   | +    | -          |
| 18   | +    | +          |
| 19   | -    | -          |
| 20   | +    | -          |
| 21   | +    | +          |
| 22   | -    | -          |
| 23   | +    | -          |
| 24   | +    | +          |
| 25   | -    | -          |
| 26   | +    | -          |
| 27   | +    | +          |
