# Supplementary figures and images for: Cell-specific exon methylation and CTCF binding in neurons regulate calcium ion channel splicing and function
Source: eLife journal article supplement (doi:10.7554/elife.54879), 2020-03-26

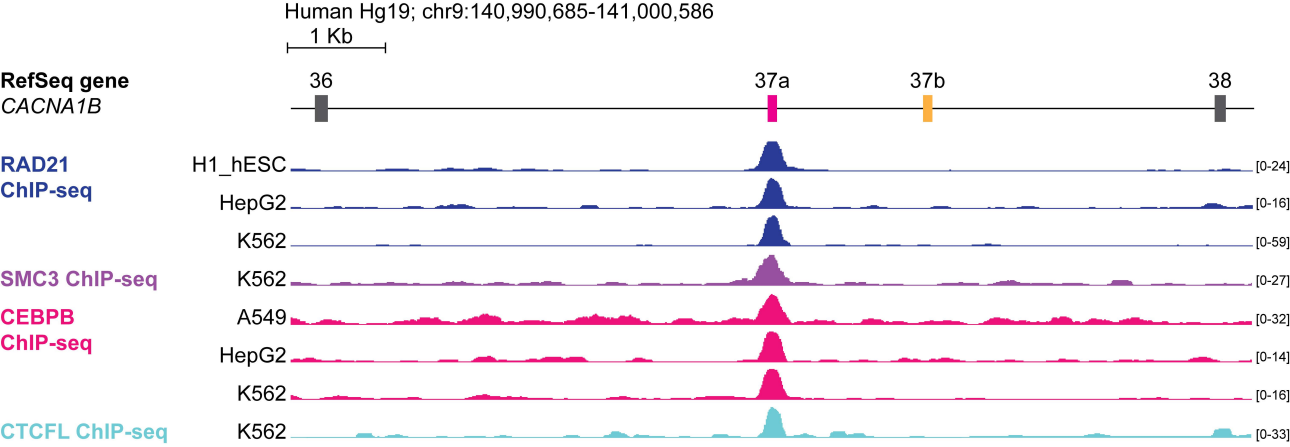

Supplement: supp [file elife-54879-supp-v1.zip]

**A**

Dead cells %

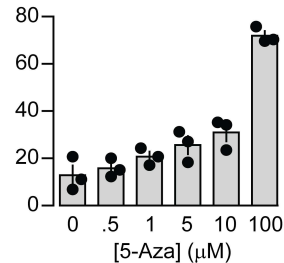**B**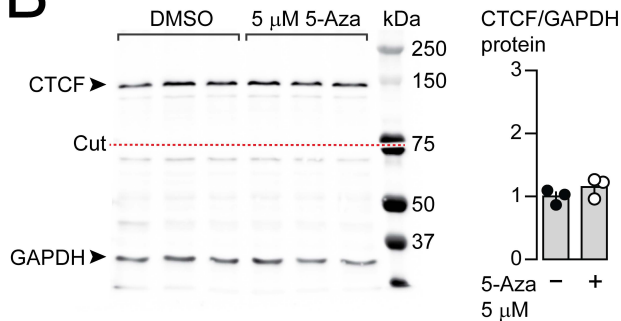**C**

Global 5-hmC %

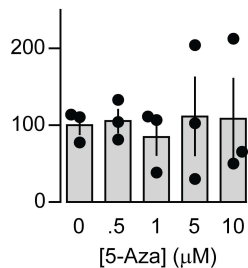**D**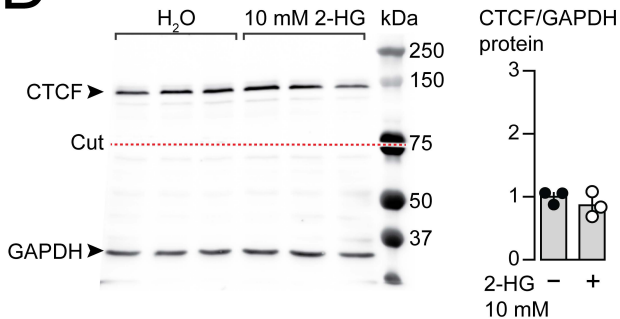**E**

Global 5-hmC %

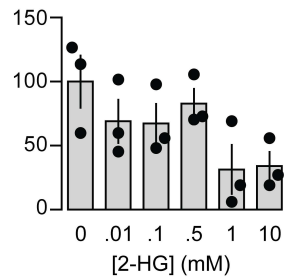

Supplement: supp [file elife-54879-supp-v1.zip]
